# Supplementary material
Source: publisher figshare collection journal article supplement (https://tandf.figshare.com/ndownloader/files/20731056)
Supplement: Supplementary file 1 [file 20731056]

**Supplemental Table 1.** **Multivariable analysis of predictors of time to first and recurrent Emergency Medical Services to Emergency Department Transport (EMS-ED) within 1 year of dialysis initiation (accounting for competing risks of death and transplant)**

| **Variable** | **First EMS-ED Event**  **(n=363; 104 EMS-ED events)** | | **Recurrent EMS-ED Events**  **(n=973; 473 EMS-ED events)** | |
| --- | --- | --- | --- | --- |
| **SHR** | **95% CI** | **HR** | **95% CI** |
| **Mean age (per years)** | 1.00 | 0.98-1.01 | 1.00 | 0.98-1.01 |
| **Male sex** | 1.09 | 0.67-1.78 | 1.06 | 0.77-1.46 |
| **Non-white Race** | 0.75 | 0.35-1.57 | 0.93 | 0.57-1.50 |
| **BMI (per kg/m2)** | 0.99 | 0.95-1.02 | 1.02 | 0.99-1.04 |
| **Laboratory values prior to first dialysis**  Hemoglobin (<100 g/L)  Albumin (< 30 g/L) | 0.99  1.04 | 0.98-1.01  0.66-1.63 | 0.99  1.12 | 0.98-1.00  0.79-1.59 |
| **Comorbidities**  Coronary Artery Disease  Congestive Heart Failure  Chronic Lung Disease  Diabetes  Peripheral Vascular Disease  Bone/joint or Rheumatologic Disease | 1.33  1.15  1.34  0.79  1.35  1.65 | 0.80-2.20  0.68-1.95  0.80-2.26  0.40-1.53  0.80-2.28  0.72-3.80 | 1.08  1.00  1.10  0.98  1.09  1.09 | 0.77-1.51  0.77-1.51  0.81-1.48  0.67-1.46  0.77-1.56  0.60-1.96 |
| **CFS Category¶**  1-2  3-4  ≥5 | Ref  1.75  **2.29** | -  0.90-3.42  **1.05-5.03** | Ref  1.61  **2.62** | -  0.91-2.85  **1.35-5.08** |
| **Cause of ESRD (%)**  Diabetes  Glomerulonephritis  Ischemic  PCKD  Other  Unknown | Ref  0.85  1.42  0.37  1.10  0.81 | -  0.35-2.07  0.69-2.93  0.08-1.78  0.48-2.52  0.35-1.89 | Ref  0.53  1.06  1.37  0.74  1.07 | -  0.28-1.01  0.65-1.72  0.54-3.45  0.44-1.25  0.62-1.85 |
| **Type of dialysis at initiation**  Arteriovenous Fistula  Central Venous Catheter  Peritoneal Dialysis | Ref  0.81  0.77 | -  0.28-2.33  0.22-2.69 | Ref  1.26  0.77 | -  0.95-1.67  0.50-1.18 |
